# Supplementary material for: Development of New‐Onset or Progressive Atrial Fibrillation in Patients With Permanent HIS Bundle Pacing Versus Right Ventricular Pacing: Results From the RUSH HBP Registry
Source: PubMed Central journal article supplement — J Am Heart Assoc. 2020 Nov 11;9(22):e018478. doi: 10.1161/JAHA.120.018478 (PMC7763709; doi:10.1161/jaha.120.018478), 2020-11-11
Supplement: JAH3-9-e018478-s001.pdf [file JAH3-9-e018478-s001.pdf]

# **SUPPLEMENTAL MATERIAL**

**Table S1. Confounders for new-onset atrial fibrillation in different pacing burden subgroups.**

| Characteristic           | HBP           | RVP           | P-value |
|--------------------------|---------------|---------------|---------|
| All patients             |               |               |         |
| Age (years)              | 72.33 ± 11.58 | 75.71 ± 10.19 | 0.061   |
| Ventricular pacing ≥ 20% |               |               |         |
| Age (years)              | 71.55 ± 12.27 | 76.76 ± 9.71  | 0.024   |
| Ventricular pacing ≥ 40% |               |               |         |
| Age (years)              | 71.24 ± 12.51 | 76.42 ± 9.42  | 0.040   |
| BMI (kg/m <sup>2</sup> ) | 30.78 ± 7.63  | 28.34 ± 5.58  | 0.090   |
| Ventricular pacing ≥ 60% |               |               |         |
| Age (years)              | 71.40 ± 12.75 | 76.51 ± 9.53  | 0.049   |
| Ventricular pacing ≥ 80% |               |               |         |
| Age (years)              | 71.15 ± 12.77 | 76.81 ± 8.75  | 0.034   |

HBP, His bundle pacing; RVP, right ventricular pacing; BMI, body mass index

**Table S2. Confounders of progression of atrial fibrillation burden by 10% in different pacing burden subgroups.**

| Characteristic                  | HBP (n =33)    | RVP ( n =44)   | P-value |
|---------------------------------|----------------|----------------|---------|
| All patients                    |                |                |         |
| Hypertension n (%)              | 27 (81.8%)     | 43 (97.7%)     | 0.016   |
| Age (years)                     | 73.33 ± 9.90   | 77.98 ± 9.23   | 0.037   |
| Native QRS (ms)                 | 112.64 ± 33.53 | 92.59 ± 16.81  | 0.003   |
| Ventricular pacing burden ≥ 20% |                |                |         |
| Age (years)                     | 75.62 ± 9.59   | 80.09 ± 6.60   | 0.081   |
| Native QRS (ms)                 | 121.52 ± 37.24 | 98.64 ± 18.68  | 0.017   |
| Ventricular pacing burden ≥ 40% |                |                |         |
| Native QRS (ms)                 | 125.65 ± 39.18 | 99.90 ± 19.12  | 0.022   |
| Ventricular pacing burden ≥ 60% |                |                |         |
| Age (years)                     | 76.14 ± 9.55   | 81.33 ± 6.20   | 0.092   |
| Native QRS (ms)                 | 131.14 ± 40.00 | 100.53 ± 19.12 | 0.018   |
| Ventricular pacing burden ≥ 80% |                |                |         |
| Age (years)                     | 75.33 ± 9.38   | 81.73 ± 5.90   | 0.067   |
| Native QRS (ms)                 | 131.33 ± 37.89 | 101.27 ± 21.40 | 0.030   |

HBP, His bundle pacing; RVP, right ventricular pacing;
